# Supplementary material
Source: PubMed Central journal article supplement (PMC4850916)

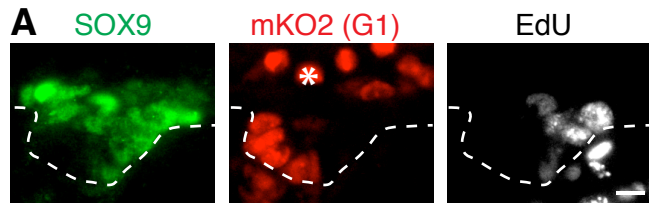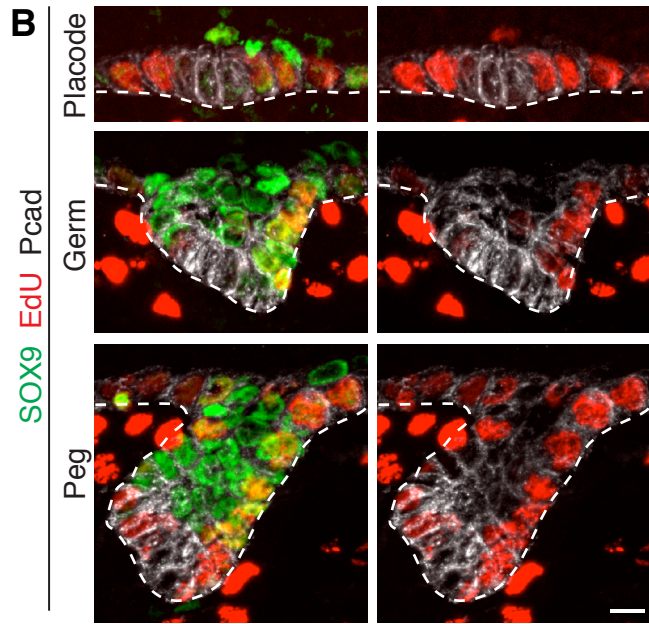

Supplement: NIHMS741370-supplement-4.pdf [file NIHMS741370-supplement-4.pdf]

WT hair buds

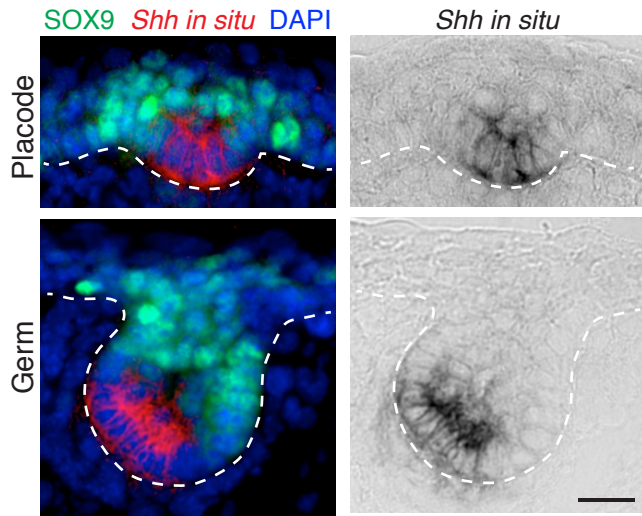

Supplement: NIHMS741370-supplement-5.pdf [file NIHMS741370-supplement-5.pdf]
